# Supplementary material
Source: MDPI journal article supplement (https://www.mdpi.com/1424-2818/14/5/325)
Supplement: s1 [file s1]

# The Impact of a Severe El Niño Event on Vascular Epiphytes in Lowland Panama

Helena J. R. Einzmann, Letizia Weichgrebe, Gerhard Zotz

Table S1: Number of individuals (I), populations (P) and species ranks (R) of surveyed epiphytes during the reference period of 2002 (02) to 2015 (15) and the El Niño event of 2015 (15) to 2016 (16). Species are sorted by individual numbers in 2016.

| Taxon                                                       | Family        | I02  | I15  | I16  | P02 | P15 | P16 | R02 | R15 | R16 |
|-------------------------------------------------------------|---------------|------|------|------|-----|-----|-----|-----|-----|-----|
| <i>Caularthron bilamellatum</i> (Rchb.f.) R.E.Schult.       | Orchidaceae   | 1354 | 1910 | 1545 | 85  | 119 | 108 | 1   | 1   | 1   |
| <i>Dimerandra emarginata</i> (G.Mey.) Hoehne                | Orchidaceae   | 875  | 1575 | 1359 | 57  | 81  | 78  | 2   | 2   | 2   |
| <i>Niphidium crassifolium</i> (L.) Lellinger                | Polypodiaceae | 653  | 1357 | 978  | 60  | 86  | 89  | 3   | 3   | 3   |
| <i>Tillandsia fasciculata</i> Sw.                           | Bromeliaceae  | 98   | 623  | 545  | 23  | 33  | 32  | 8   | 4   | 4   |
| <i>Tillandsia bulbosa</i> Hook.                             | Bromeliaceae  | 474  | 591  | 484  | 49  | 63  | 61  | 4   | 5   | 5   |
| <i>Werauhia sanguinolenta</i> Cogn. & Marchal               | Bromeliaceae  | 155  | 402  | 337  | 29  | 53  | 49  | 6   | 6   | 6   |
| <i>Polystachya foliosa</i> (Hook.) Rchb.f.                  | Orchidaceae   | 77   | 240  | 241  | 9   | 23  | 20  | 9   | 9   | 7   |
| <i>Vittaria lineata</i> (L.) Sm.                            | Pteridaceae   | 99   | 290  | 232  | 22  | 42  | 41  | 7   | 7   | 8   |
| <i>Epidendrum nocturnum</i> Jacq.                           | Orchidaceae   | 180  | 268  | 196  | 9   | 17  | 17  | 5   | 8   | 9   |
| <i>Tillandsia subulifera</i> Mez                            | Bromeliaceae  | 62   | 177  | 176  | 13  | 29  | 26  | 10  | 10  | 10  |
| <i>Sobralia bletiae</i> Rchb.f.                             | Orchidaceae   | 24   | 88   | 62   | 7   | 18  | 14  | 13  | 11  | 11  |
| <i>Guzmania monostachia</i> (L.) Rusby ex Mez               | Bromeliaceae  | 44   | 53   | 55   | 7   | 8   | 8   | 11  | 12  | 12  |
| <i>Brassavola nodosa</i> (L.) Lindl.                        | Orchidaceae   | 6    | 52   | 51   | 4   | 6   | 5   | 21  | 13  | 13  |
| <i>Anthurium brownie</i> Mast.                              | Araceae       | 18   | 52   | 49   | 8   | 20  | 20  | 15  | 13  | 14  |
| <i>Specklinia brighamii</i> (S.Watson) Pridgeon & M.W.Chase | Orchidaceae   |      | 8    | 40   |     | 4   | 3   |     | 25  | 15  |
| <i>Catasetum viridiflavum</i> Hook.                         | Orchidaceae   | 42   | 52   | 39   | 21  | 21  | 18  | 12  | 13  | 16  |
| <i>Epidendrum rigidum</i> Jacq.                             | Orchidaceae   |      | 33   | 39   |     | 6   | 6   |     | 15  | 16  |
| <i>Anthurium durandii</i> Engl.                             | Araceae       | 11   | 41   | 35   | 6   | 11  | 13  | 18  | 14  | 17  |
| <i>Anthurium friedrichsthali</i> Schott                     | Araceae       | 1    | 28   | 35   | 1   | 4   | 3   | 26  | 16  | 17  |
| <i>Campyloneurum phyllitidis</i> (L.) C. Presl              | Polypodiaceae | 7    | 18   | 28   | 4   | 7   | 14  | 20  | 18  | 18  |
| <i>Oncidium stipitatum</i> Lindl.                           | Orchidaceae   | 21   | 18   | 18   | 7   | 6   | 5   | 14  | 18  | 19  |
| <i>Prosthechea chimborazoensis</i> (Schltr.) W.E.Higgins    | Orchidaceae   | 7    | 17   | 16   | 3   | 8   | 8   | 20  | 19  | 20  |

| Taxon                                                              | Family          | I02 | I15 | I16 | P02 | P15 | P16 | R02 | R15 | R16 |
|--------------------------------------------------------------------|-----------------|-----|-----|-----|-----|-----|-----|-----|-----|-----|
| <i>Codonanthe crassifolia</i> (H.Focke) C.V.Morton                 | Gesneriaceae    | 16  | 19  | 13  | 7   | 9   | 7   | 16  | 17  | 21  |
| <i>Coussapoa asperifolia</i> Trécul                                | Urticaceae      | 2   | 13  | 13  | 2   | 8   | 8   | 25  | 21  | 21  |
| <i>Clusia uvitana</i> Pittier                                      | Clusiaceae      | 8   | 12  | 12  | 7   | 8   | 8   | 19  | 22  | 22  |
| <i>Anthurium gracile</i> (Rudge) Lindl.                            | Araceae         |     | 15  | 11  |     | 3   | 3   |     | 20  | 23  |
| <i>Philodendron radiatum</i> Schott                                | Araceae         | 1   | 10  | 11  | 1   | 9   | 9   | 26  | 24  | 23  |
| <i>Philodendron sagittifolium</i> Liebm.                           | Araceae         | 7   | 10  | 10  | 1   | 2   | 2   | 20  | 24  | 24  |
| <i>Aechmea setigera</i> Mart. ex Schult. & Schult.f.               | Bromeliaceae    |     | 11  | 9   |     | 3   | 3   |     | 23  | 25  |
| <i>Maxillaria uncata</i> Lindl.                                    | Orchidaceae     |     | 6   | 9   |     | 2   | 2   |     | 27  | 25  |
| <i>Epiphyllum phyllanthus</i> (L.) Haw.                            | Cactaceae       | 2   | 8   | 8   | 2   | 2   | 2   | 25  | 25  | 26  |
| <i>Anthurium clavigerum</i> Poepp.                                 | Araceae         | 4   | 8   | 7   | 3   | 4   | 4   | 23  | 25  | 27  |
| <i>Camaridium ochroleucum</i> Lindl.                               | Orchidaceae     |     | 7   | 7   |     | 3   | 3   |     | 26  | 27  |
| <i>Tillandsia elongata</i> Kunth                                   | Bromeliaceae    |     | 8   | 6   |     | 7   | 5   |     | 25  | 28  |
| <i>Philodendron tripartitum</i> (Jacq.) Schott                     | Araceae         |     | 7   | 6   |     | 4   | 3   |     | 26  | 28  |
| <i>Elaphoglossum sporadolepis</i> (Kunze ex Kuhn) T. Moore         | Dryopteridaceae |     | 6   | 6   |     | 1   | 1   |     | 27  | 28  |
| <i>Epidendrum schlechterianum</i> Ames                             | Orchidaceae     | 1   | 10  | 4   | 1   | 2   | 2   | 26  | 24  | 29  |
| <i>Pecluma hygrometrica</i> (Splitg.) M.G. Price                   | Polypodiaceae   |     | 6   | 3   |     | 3   | 2   |     | 27  | 30  |
| <i>Philodendron inconcinnum</i> Schott                             | Araceae         |     | 3   | 3   |     | 2   | 2   |     | 29  | 30  |
| <i>Clusia minor</i> L.                                             | Clusiaceae      |     | 2   | 3   |     | 2   | 3   |     | 30  | 30  |
| <i>Epidendrum difforme</i> Jacq.                                   | Orchidaceae     |     | 5   | 2   |     | 1   | 1   |     | 28  | 31  |
| <i>Aspasia principissa</i> Rchb.f.                                 | Orchidaceae     | 2   | 2   | 2   | 1   | 1   | 1   | 25  | 30  | 31  |
| <i>Anthurium scandens</i> (Aubl.) Engl.                            | Araceae         |     |     | 2   |     |     | 1   |     |     | 31  |
| <i>Aechmea tillandsioides</i> (Mart. ex Schult. & Schult.f.) Baker | Bromeliaceae    | 5   | 2   | 1   | 1   | 2   | 1   | 22  | 30  | 32  |
| <i>Ficus obtusifolia</i> Kunth                                     | Moraceae        | 1   | 2   | 1   | 1   | 2   | 1   | 26  | 30  | 32  |
| <i>Ficus citrifolia</i> Mill.                                      | Moraceae        | 1   | 1   | 1   | 1   | 1   | 1   | 26  | 31  | 32  |
| <i>Bulbophyllum pachyrachis</i> (A.Rich.) Griseb.                  | Orchidaceae     |     | 1   | 1   |     | 1   | 1   |     | 31  | 32  |
| <i>Ficus paraensis</i> (Miq.) Miq.                                 | Moraceae        |     | 1   | 1   |     | 1   | 1   |     | 31  | 32  |
| <i>Ficus popenoei</i> Standl.                                      | Moraceae        |     | 1   | 1   |     | 1   | 1   |     | 31  | 32  |
| <i>Serpocaulon triseriale</i> (Sw.) A.R.Sm.                        | Polypodiaceae   |     | 1   | 1   |     | 1   | 1   |     | 31  | 32  |
| <i>Polypodiopsida</i> sp.                                          |                 | 2   |     | 1   | 2   |     | 1   | 25  |     | 32  |
| <i>Catopsis sessiliflora</i> (Ruiz & Pav.) Mez                     | Bromeliaceae    | 7   | 2   |     | 2   | 1   |     | 20  | 30  |     |
| <i>Dichaea panamensis</i> Lindl.                                   | Orchidaceae     | 3   | 1   |     | 1   | 1   |     | 24  | 31  |     |

| <b>Taxon</b>                                             | <b>Family</b> | <b>I02</b>  | <b>I15</b>  | <b>I16</b>  | <b>P02</b> | <b>P15</b> | <b>P16</b> | <b>R02</b> | <b>R15</b> | <b>R16</b> |
|----------------------------------------------------------|---------------|-------------|-------------|-------------|------------|------------|------------|------------|------------|------------|
| <i>Ponera graminifolia</i> (Knowles & Westc.) Lindl.     | Orchidaceae   |             | 1           |             |            | 1          |            |            | 31         |            |
| <i>Ananthacorus angustifolius</i> (Sw.) Underw. & Maxon  | Pteridaceae   | 13          |             |             | 2          |            |            | 17         |            |            |
| <i>Peperomia cordulata</i> C. DC.                        | Piperaceae    | 5           |             |             | 1          |            |            | 22         |            |            |
| <i>Anthurium schlechtendalii</i> Kunth                   | Araceae       | 4           |             |             | 1          |            |            | 23         |            |            |
| <i>Anthurium fragrantissimum</i> Croat                   | Araceae       | 2           |             |             | 1          |            |            | 25         |            |            |
| <i>Philodendron hederaceum</i> (Jacq.) Schott            | Araceae       | 2           |             |             | 1          |            |            | 25         |            |            |
| <i>Guarianthe patinii</i> (Cogn.) Dressler & W.E.Higgins | Orchidaceae   | 1           |             |             | 1          |            |            | 26         |            |            |
| <i>Microgramma lycopodioides</i> (L.) Copel.             | Polypodiaceae | 1           |             |             | 1          |            |            | 26         |            |            |
| <b>Total</b>                                             |               | <b>4298</b> | <b>8074</b> | <b>6715</b> | <b>465</b> | <b>753</b> | <b>718</b> |            |            |            |
